# Supplementary material for: Re-development of mental health first aid guidelines for supporting Aboriginal and Torres Strait Islanders who are engaging in non-suicidal self-injury
Source: BMC Psychiatry. 2017 Aug 22;17:300. doi: 10.1186/s12888-017-1465-1 (PMC5568063; doi:10.1186/s12888-017-1465-1)
Supplement: Additional file 1: — AMHFA NSSI endorsed and rejected items, contains the ratings for all the statements that were presented to the panel. (XLSX 21 kb) [file 12888_2017_1465_MOESM1_ESM.xlsx]

## Sheet: NSSI Endorsed Items
		New item in Round 2	Round Endorsed	Round 1 endorsed ratings	Round 2 endorsed ratings	Round 3 endorsed rating
Item
SECTION 1: What the first aider should know about self-injury
The first aider should be aware of:	1. What non-suicidal self-injury is.		1	100
	2. The signs that indicate that a person may have been self-injuring.		1	100
	3. How common non-suicidal self-injury is.		1	96.1538
	4. The reasons why people self-injure.		1	100
	6. The physical and mental health risks of self-injuring.		1	96.1538
	7. The relationship between NSSI and suicide.		1	100
	10. That self-injury can be a symptom of a mental health problem that can be treated.		1	96.1538
	11. The types of professional help available for self-injury.		1	96.1538
	13. That self injury cannot be stopped overnight, and people will need time to recover and learn healthy coping mechanisms.		2	88.4615	96
	16. That even though the first aider can offer support, they are not responsible for the actions or behaviour of someone else, and cannot control what they might decide to do.		1	92.3077
In order to practice cultural competence when supporting an Aboriginal person who you is engaging in deliberate self-injury, the first aider should:	20. Learn about the behaviours that are considered warning signs for self-injury in the person’s community.		1	92.3077
	21. Take into consideration the spiritual and/or cultural context of the person's self-injury.		1	92.3077
	22. Be aware that pathological self-injury, such as cutting and burning, is fundamentally different to ritualistic, culturally accepted Aboriginal ceremonial or grieving practice.		2	88.4615	96
	23. Distinguish between cultural practice and deliberate self-injury by being aware of the local cultural practices.		1	92.3077
	25. Distinguish between cultural practice and deliberate self-injury by engaging the help of local Aboriginal health workers or respected Elders.		1	92.3077
	N1. Be aware that not all aboriginal communtiies have ritualistic practices that involve cutting and self-injury.	*	2		96
	N2. NOT use shame as a way to change the person's behaviour.	*	2		96
SECTION 2: If the first aider finds someone injuring themselves
If the first aider interrupts someone who is engaging in self-injury, they should:	27. Remain calm and avoid expressions of shock or anger.		1	100
	28. Only take action if they judge it is safe to do so.		1	92.3077
	29. Intervene in a supportive and non-judgemental way.		1	92.3077
	32. Express their concern and ask whether they can do anything to alleviate the distress.		1	100
	33. Ask if the person is suicidal.		1	92.3077
	34. Ask whether any medical attention is needed.		2	88.4615	96
	35. Offer physical first aid for the injury without being insistent, If the first aider has relevant physical first aid skills.		2	84.6154	96
40. The first aider should take the person to the emergency department if a wound or injury is serious.			2	80.7692	92
41. The first aider should contact emergency services if a wound or injury is serious.			1	96.1538
42. If the person has harmed themselves by taking an overdose of medication or consuming poison, the first aider should call an ambulance as the risk of permanent harm or death is high.			1	100
N5. If urgent medical attention is required and an ambulence is called, the first aider should let the person know that you have called for help and that you are there for them until help arrives.		*	2		100
SECTION 3: If the first aider suspects self-injury
43. If the first aider notices self-inflicted injuries, they should not express a strong emotional response of anger, fear, revulsion or frustration.			1	100
The first aider should:	45. Not assume that people who self-harm are suicidal.		2	88.4615	100
	46. Take all self-injuring behaviour seriously regardless of severity of the injuries or the intent.		1	96.1538
	47. Not ignore the injuries.		1	92.3077
51. The first aider should keep in mind that if someone is showing their injuries, they may be hoping for the opportunity to discuss them with someone.			1	100
56. If the person is receiving psychiatric care, the first aider should ask if the treating professional knows about the injuries.			2		92
SECTION 4: Discussing self-injury
58. If the first aider feels they are unable to talk to the person who is self-injuring, they should help them to find someone else to talk to.			1	100
59. The first aider should discuss their concerns with the person in a private place.			2	88.4615	92
61. If the person doesn't want to talk right away, the first aider should let the person know that they want to listen to them when they are ready.			1	100
63. If the person is reluctant to talk, the first aider should ask the person what would make them feel safe enough to be able to discuss their feelings.			1	96.1538
64. The first aider should respect that the person might not want to talk about their self-injuring.			1	92.3077
N6. The first aider should check if the person is already getting help for their self-injuring.		*	2		96
67. If the person doesn't want to talk, the first aider should behave in a supportive and non-judgemental way.			1	100
The first aider should:	68. Be supportive without being permissive of the behaviour.		1	96.1538
	69. Use a calm voice when they are talking to the person.		1	100
	70. Not express anger or a desire to punish the person for self-injuring.		1	100
	72. Be comfortable with silence, allowing the person time to process what has been talked about.		1	100
	73. Be aware of what their body language is communicating about their attitudes.		1	100
	75. Be prepared for the expression of intense emotions.		1	96.1538
	77. Tell the person they are concerned about their need to self-injure.		1	96.1538
	78. Ask the person questions about their self-injury, but should not put pressure on them to talk about it.		2	88.4615	100
	80. Ask open-ended questions about the person's feelings and self-injury.		2	88.4615	92
	82. Validate the person's emotions by explaining that these emotions are appropriate and valid.		2	80.7692	92
	81. Acknowledge the emotional pain behind the self-injury.		1	96.1538
	85. Let the person know that they are not alone and that they are there to support them.		1	92.3077
	86. Express empathy for how the person is feeling.		1	92.3077
	87. Focus their entire attention on the person.		2	84.6154	92
	89. Reflect what the person is saying by acknowledging their experience as they are describing it.		1	96.1538
	90. Use 'I' statements instead of 'you' statements (e.g. "I feel worried/angry/frustrated when you…" instead of "You make me feel worried/angry/frustrated…") when talking with the person.		1	96.1538
91. If the first aider needs to tell somebody about the person's self-injury to keep them safe, they should speak to the person about this first.			2	80.7692	92
The first aider should:	92. Reassure the person that they are not disgusted by them and that they are not a bad person.		2	80.7692	92
	95. Reassure the person that there are sources of help and support available.		1	96.1538
	96. The first aider should tell the person that they want to help.		2	88.4615	100
	97. Let the person know the ways in which they are willing to help the person.		1	96.1538
	100. Explain to the person what treatment might involve and how they could benefit from it.		2	80.7692	96
	101. Express optimism about the benefits of treatment and the possibility of learning other ways to cope.		2	88.4615	96
	103. Help the person to think about their self-injury not as a shameful secret, but as a problem to be sorted out.		1	92.3077
	105. Work collaboratively with the person in finding solutions (i.e. by finding out what they want to happen, discussing any possible actions with them).		1	100
	106. Keep in mind that 'stopping self-injury' should not be the focus, and look at what can be done to make the person's life more manageable, or their environment less distressing.		1	100
The first aider should NOT:	108. Minimise the person's feelings or problems.		1	100
	109. Use statements that don't take the person's pain seriously (such as 'but you've got a great life' or 'things aren't that bad').		1	96.1538
	110. Offer drugs, prescription pills or alcohol to the person.		1	96.1538
	111. Use terms such as "self-mutilator," "self-injurer," or a "cutter" to refer to the person.		2	88.4615	100
	112. Accuse the person of attention-seeking.		1	96.1538
	113. Try to make the person stop self-injuring (e.g. by removing self-injury tools) or give them ultimatums (i.e. "If you don't stop self-injuring you have to move out").		1	92.3077
	114. Promise the person that they will keep their self-injury a secret.		2	84.6154	96
	115. Gossip or talk to others about the person's self-injury without their permission.		1	96.1538
	116. Try to solve the person's problems for them.		1	100
	117. Expect the person to be able to stop self-injuring immediately.		1	92.3077
	119. Make the person feel guilty about the effect their self-injury is having on others.		2	88.4615	100
SECTION 5: Alternatives to self-injury
The first aider should encourage the person to:	122. Seek other ways to relieve their distress.		1	96.1538
	123. Use any positive coping strategy which helps them to get through the urge to self-injure.		1	100
	124. Talk about their feelings rather than self-injuring.		1	96.1538
	125. Share their feelings with other people, such as a close friend or family member, when they are feeling distressed.		1	92.3077
	126. Speak to someone they trust next time they feel the urge to self-injure.		1	100
The first aider should:	134. Help the person to use their coping strategies that do not involve self-injuring.		1	96.1538
	135. Help the person think of ways to reduce their distress, for example, having a hot bath, listening to loud music, or doing something kind for themselves.		1	100
	136. Suggest some alternative coping strategies and discuss with the person what might be helpful for them.		1	96.1538
	138. Help the person to make a plan about what to do when they feel like self-injuring.		1	92.3077
	139. Suggest the person calls someone they trust if they feel distressed or want to hurt themselves.		1	92.3077
	N7. Share any information they have available about alternatives to self-injury.	*	2		92
	N8. Offer the person any information materials (e.g. factsheets) about alternatives to self-injury, that are available in a language the person is able to read.	*	2		96
	N9. Provide information on phone services that provide anonymous support to people in distress.	*	2		100
	N10. Encourage the person to develop a list of trusted people and services that can provide support during periods of distress.	*	2		96
SECTION 6: Harm minimisation practises
144. If the first aider lives with the person, they should ensure that adequate first aid supplies are available.			1	96.1538
SECTION 7: Seeking help
The first aider should:	145. Not try to force the person to accept treatment.		1	92.3077
	146. Encourage the person to seek professional help.		1	100
	147. Let the person remain in control over seeking help as much as possible.		1	100
	148. Help the person map out a plan of action for seeking help. Talk about how you can help them to seek treatment and who you can talk to (for example, a parent, an Aboriginal health worker, a GP, a community mental health service).		1	96.1538
	149. Suggest and discuss options for getting help, rather than directing the person what to do.		1	96.1538
	151. Provide praise for any steps the person takes towards getting appropriate professional help.		1	96.1538
	153. The first aider should follow up with the person to check whether they have found professional help that is suitable for them.		1	96.1538
The first aider should seek appropriate professional help if:	154. The injury is severe or getting more severe, such as cuts getting deeper or bones being broken.		2	73.0769	100
	155. The person has expressed a desire to die.		2	76.9231	100
	156. The person asks them to.		2	73.0769	100
	157. The self-injurious behaviour is interfering with daily life.		2	80.7692	92
	158. The person has injured their eyes.		2	80.7692	100
	159. The person has injured their genitals.		2	80.7692	100
SECTION 8: Adolescent specific
161. The first aider should not promise the adolescent that they will keep their self-injury a secret.			1	96.1538
164. If the adolescent doesn't want to talk to the first aider, the first aider should help the adolescent find a trusted adult to talk to.			1	100
166. If the first aider lives with the adolescent, they should ensure that adequate first aid supplies are available.			1	92.3077
The first aider should:	169. Encourage the adolescent to seek professional help.		1	100
	171. Let the adolescent remain in control over seeking help as much as possible.		1	96.1538
	172. Suggest and discuss options for getting help, rather than directing the adolescent what to do.		1	96.1538
	173. Help the adolescent map out a plan of action for seeking help. Talk about how you can help them to seek treatment and who you can talk to (e.g., a parent, an Aboriginal social worker or health worker, a community liaison officer, or a community mental health service).		1	96.1538
	174. Help the adolescent to find a mental health service and mental health professional they can talk to.		1	92.3077
	175. Offer to go along with them to see a GP, Aboriginal mental health worker or other mental health professional.		1	92.3077

## Sheet: NSSI Rejected Items
		New item in Round 2	Round Rejected	Round 1 endorsed ratings	Round 2 endorsed ratings	Round 3 endorsed ratings
Item
SECTION 1: What the first aider should know about self-injury
The first aider should be aware of:	5. That not all people who self-injure want to change their behaviour.		2	80.7692	64
	8. That self injury is very rarely used as a means of seeking attention due to the intense shame most people feel about their wounds and scars.		2	84.6154	80
	9. That self-injury is a very private thing and is hard to talk about.		2	88.4615	84
	12. That being overly attentive can reinforce the self-injuring behaviour.		1	57.6923
	14. That distressed persons might imitate self-injury if they observe it in someone similar to themselves.		1	61.5385
	15. That it is natural to feel upset, helpless, even angry upon finding out someone self-injures.		2	88.4615	88
	17. That incidents of self-injury are often associated with alcohol and substance abuse.		1	50
	18. The incidents of self-injury can be preceded by sexual assault.		1	65.3846
	19. That incidents of self-injury are often preceded by interpersonal conflicts.		1	69.2308
In order to practice cultural competence when supporting an Aboriginal person who you is engaging in deliberate self-injury, the first aider should:	24. Distinguish between cultural practice and deliberate self-injury by asking the person why they are injuring themselves.		2	84.6154	88
	26. Be aware that Aboriginal people are more likely than non-Aboriginal people to engage in, and be hospitalised for, intentional self-injury.		1	76.9231
SECTION 2: If the first aider finds someone injuring themselves
If the first aider interrupts someone who is engaging in self-injury, they should:	30. Not physically force the person to stop.		1	73.0769
	31. Ask the person to stop.		1	76.9231
	36. Avoid overreacting. Medical attention is only required if the injury is severe.		1	76.9231
37. If the first aider interrupts someone who is engaging in self-injury in the presence of others, they should take the person away from the situation so they don't attract unnecessary attention.			1	61.5385
38. If the first aider interrupts someone who is engaging in self-injury in the presence of others, they should request the other people to leave the location.			1	46.1538
39. The first aider should encourage the person to care for their own wounds if they are not severe.			1	46.1538
N3. If the first aider interrupts someone who is engaging in self-injury in the presence of others and the injuries do not require medical attention, the first aider should request the other people to leave the location.		*	2		36
N4. If the first aider interrupts someone who is engaging in self-injury in the presence of others and the injuries do not require medical attention, the first aider should ask the person if they would like the other people to leave the location.		*	2		72
SECTION 3: If the first aider suspects self-injury
44. The first aider should be respectful of the person's right to injure themselves.			1	65.3846
48. If the first aider suspects the person is self-injuring, they should not search through their things for evidence of their self-injuring.			1	42.3077
49. If the first aider suspects the person is self-injuring, they should not demand to talk about things that the person is not ready to discuss.			1	76.9231
50. The first aider should act quickly, as ignoring self-injury or thinking the self-injury is just a phase will not make it go away.			2	80.7692	84
52. The first aider should directly express their concerns that the person may be injuring themselves.			2	80.7692	84
53. If the first aider is unsure whether the wounds are from self injury or from a suicide attempt, they should ask the person directly.			1	76.9231
54. The first aider should ask the person about injuries which they suspect are self-inflicted.			1	69.2308
55. The first aider should ask about self-injury in a way that makes it clear to the person that they understand a bit about self-injury.			2	84.6154	84
SECTION 4: Discussing self-injury
57. Before talking to the person about self-injury, the first aider should acknowledge and deal with their own feelings about self-injuring behaviours.			2	80.7692	80
60. The first aider should pick a time to talk to the person when they are both not under time pressure, when they are rested and focused, and free from distractions.			2	84.6154	80
62. If the person is reluctant to talk about self-injury, the first aider should not force the issue unless the injury is severe.			2	88.4615	80
65. The first aider should give the person their contact details and let them know they are available to talk when needed.			1	76.9231
66. If the person doesn't want to talk, the first aider should ask a health professional for advice on what to do.			2	84.6154	80
The first aider should:	71. Use the phrase 'self-injury' to encourage the person to talk.		1	69.2308
	74. Understand how self-injury makes the person's life easier and accept their reasons for doing it.		1	65.3846
	76. Tell the person that they care about them.		1	69.2308
	79. Ask questions about their self-injury (e.g., how long they have been doing it, how often, and why it is done, including how it makes them feel) if the person is receptive to the conversation.		1	76.9231
	83. Focus the conversation on the person’s feelings and emotions, rather than on their self-injury.		2	88.4615	88
	84. Let the person know that they are sorry that they are experiencing such distress and that they feel the need to injure themselves.		1	69.2308
	88. Let the person do most of the talking.		2	84.6154	76
	93. Reinforce that they value the person but dislike their self-injuring behaviour.		1	57.6923
	94. Reassure the person that they are not the only one who self-injures.		1	53.8462
	98. Help the person to find out more about self-injury (e.g. pamphlets, the internet or the library).		1	69.2308
	99. The first aider should let the person know the long-term emotional and/or physical consequences of self-injuring.		1	61.5385
102. If the first aider has also dealt with self-injury, either themselves or with a loved one, they should consider telling the person about their experiences, so they feel less alone.			1	30.7692
104. The first aider should acknowledge that self-injury is a powerful coping mechanism but that it is not a good thing to do.			1	73.0769
107. The first aider should not touch (e.g. hug or hold hands with) the person without their permission.			1	69.2308
118. The first aider should NOT Accept the notion that self-injuring is part of a person's identity (e.g. indicates that they are tough or rebellious).			1	65.3846
120. The first aider should avoid setting goals or pacts, such as: "If you promise not to hurt yourself between now and next week, you're doing really well," unless the person asks you to do this.			1	61.5385
121. The first aider should ask the person whether they are comfortable showing their injuries so the first aider can gauge the need for medical attention.			1	76.9231
SECTION 5: Alternatives to self-injury
The first aider should encourage the person to:	127. Phone or talk to someone who is willing to act as a 'sponsor' and discourage self-injury whenever they feel the urge to injure themselves. Someone who has managed to quit self-injury would be an ideal sponsor, similar to Alcoholics Anonymous.		2	84.6154	72
	128. Draw or write about their distress instead of self-injuring.		2	88.4615	68
	129. Do something such as scream into a pillow or punch their bedding as a way to relieve distress without self-injuring.		1	50
	130. The first aider should encourage the person to do some exercise instead of self-injuring.		1	57.6923
	131. Delay injuring themselves; for example, to wait ten minutes and then reassess the urge to self-injure.		1	69.2308
	132. Practise relaxation techniques, such as progressive muscle relaxation, when they feel the urge to self-injure.		2	80.7692	88
The first aider should:	133. Offer the person information materials (e.g. a website or factsheet) about alternatives to self-injury.		1	76.9231
	137. Share with the person the non-harmful methods they use for coping with distress.		1	76.9231
SECTION 6: Harm minimisation practises
140. The first aider should take away the person's self-injury tools.			1	19.2308
141. The first aider should not remove or hide the person's self-injury tools unless they are asked to.			1	46.1538
142. The first aider should offer to take away the person's self-injury tools.			1	76.9231
143. The first aider should encourage the person to learn physical first aid for their injuries.			1	73.0769
SECTION 7: Seeking help
The first aider should:	150. Help the person to find an Aboriginal health worker or mental health service they can talk to.		2	80.7692	84
	152. Offer to go along with the person to see an appropriate professional (for example, a GP, an Aboriginal health worker or social worker, a community liaison officer or a community mental health service).		2	80.7692	80
SECTION 8: Adolescent specific
160. If the first aider suspects the adolescent is self-injuring, they should not search through their things for evidence of their self-injuring.			1	57.6923
162. The first aider should encourage the adolescent to care for their own wounds if they are not severe.			1	61.5385
165. The first aider should not remove or hide the adolescent's self-injury tools unless they are asked to.			1	50
The first aider should:	167. Ensure they receive a professional mental health assessment.		2	88.4615	88
	168. Tell the person that self-injury is a coping mechanism that is harmful to them.		2	88.4615	68
	170. Not try to force the adolescent to accept treatment.		2	88.4615	76
176. The first aider should ask the adolescent if they have experienced any abuse.			1	38.4615
